# Supplementary material for: Anatomic study of the innervation of Extensor Carpi Radialis Longus and Extensor Carpi Radialis Brevis. Interest in nerve transfers.
Source: Research Square preprint supplement (doi:10.21203/rs.3.rs-1883284/v1), 2022-08-01
Supplement: Supplementary file 1 [file 0cfdbb33e55329771310fa2b.docx]

| **ECRB** | | | | | |
| --- | --- | --- | --- | --- | --- |
| **Specimen** | **Number of branches** | **Origin** | **Distance (mm)** | **Lenght (mm)** | **Taylor type** |
| **1** | 1 | Deep branch of radial nerve | 20 | 30 | 1 |
| **2** | 1 | Deep branch of radial nerve | 12 | 55 | 1 |
| **3** | 1 | Deep branch of radial nerve | 24 | 45 | 1 |
| **4** | 1 | Superficial branch of radial nerve | 26 | 55 | 1 |
| **5** | 1 | Superficial branch of radial nerve | 31 | 60 | 1 |
| **6** | 1 | Deep branch of radial nerve | 39 | 47 | 2 |
| 33 |
| **7** | 1 | Deep branch of radial nerve | 25 | 66 | 1 |
| **8** | 1 | Deep branch of radial nerve | 13 | 76 | 1 |
| **9** | 1 | Deep branch of radial nerve | 25 | 87 | 1 |

Table 2. ECRB innervation characteristics including: the specimen, number of branches, origin of motor branches, distance from the origin to the intercondylar line, length from its origin to the entrance into the muscle and Taylor type.
