# Supplementary material for: Anatomic study of the innervation of Extensor Carpi Radialis Longus and Extensor Carpi Radialis Brevis. Interest in nerve transfers.
Source: Research Square preprint supplement (doi:10.21203/rs.3.rs-1883284/v1), 2022-08-01
Supplement: Supplementary file 2 [file 523440e4c7a27f894c415159.docx]

| **ECRL** | | | | | |
| --- | --- | --- | --- | --- | --- |
| **Specimen** | **Number of branches** | **Origin** | **Distance (mm)** | **Length (mm)** | **Taylor type** |
| **1** | 2 | Radial nerve | -28 | 20 | 3 |
| -10 | 31 |
| **2** | 2 | Radial nerve | -16 | 36 | 3 |
| -7 | 42 |
| **3** | 2 | Radial nerve | -24 | 60 | 3 |
| Deep branch of radial nerve | -7 | 50 |
| **4** | 1 | Radial nerve | -17 | 36 | 1 |
|
| **5** | 1 | Radial nerve | 10 | 43 | 1 |
|
| **6** | 2 | Radial nerve | -15 | 36 | 3 |
| -6 | 55 |
| **7** | 2 | Radial nerve | -35 | 37 | 3 |
| -15 | 66 |
| **8** | 1 | Radial nerve | -31 | 57 | 2 |
|
| **9** | 2 | Radial nerve | -40 | 50 | 3 |
| -25 | 48 |

Table 1. ECRL innervation characteristics including: the specimen, number of branches, origin of motor branches, distance from the origin to the intercondylar line, length from its origin to the entrance into the muscle and Taylor type.
